# Supplementary material for: Controllable wettability by tailoring one-dimensional tellurium micro–nanostructures
Source: Royal Society of Chemistry journal article supplement (doi:10.1039/c3ce41534a), 2013-01-01
Supplement: c3ce41534a.pdf [file c3ce41534a.pdf]

## Supporting Information

### Controllable wettability by tailoring one-dimensional tellurium micro-nanostructures

Qisheng Wang,<sup>†a</sup> Muhammad Safdar,<sup>†a</sup> Xueying Zhan,<sup>a</sup> and Jun He<sup>a,\*</sup>

National Center for Nanoscience and Technology, Beijing 100190, China

\*To whom correspondence should be addressed: hej@nanoctr.cn

<sup>†</sup>Equal contribution

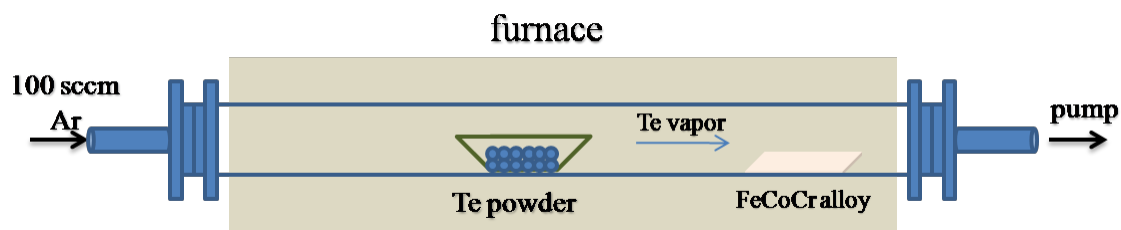

**Figure S1.** Schematic diagram of PVD growth process of Te micro-nanostructures on FeCoCr alloy

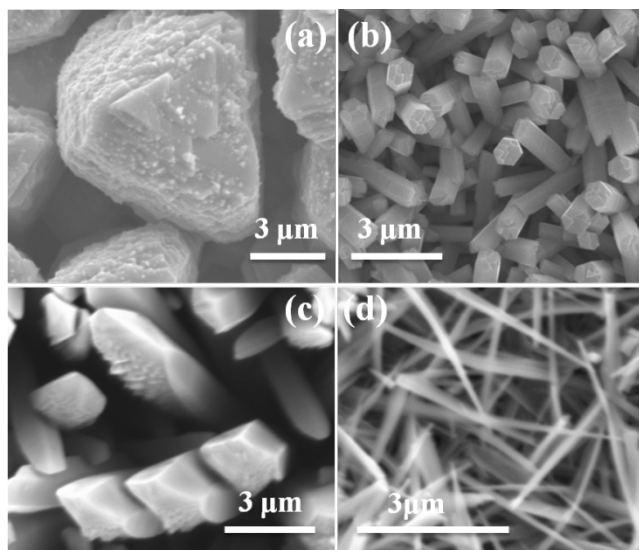

**Figure S2.** (a) Triangle microrods array, (b) hexagon microrods array, (c) needle microrods array and (d) random-oriented needle nanowires networks are magnified SEM images of Figure 1 (a), (c), (e) and (g), respectively.

**Table S1.** Spacing of triangle microrods array, hexagon microrods array, needle microrods array and needle nanowires networks. Each measurement was carried out 10 times.

| Patterns                                                                            | $d$ ( $\mu\text{m}$ ) |     |      |     |      |      |     |     |     |     | average |
|-------------------------------------------------------------------------------------|-----------------------|-----|------|-----|------|------|-----|-----|-----|-----|---------|
|                                                                                     | 1                     | 2   | 3    | 4   | 5    | 6    | 7   | 8   | 9   | 10  |         |
|  | 9.4                   | 7.4 | 11.2 | 9.8 | 11.4 | 11.6 | 8.8 | 9.7 | 7.4 | 9.7 | 9.7     |
|  | 1.2                   | 1.3 | 1.0  | 1.3 | 1.1  | 1.1  | 1.2 | 1.0 | 1.3 | 1.0 | 1.2     |
|  | 1.8                   | 2.0 | 2.1  | 2.0 | 1.8  | 1.8  | 1.9 | 1.9 | 1.9 | 2.3 | 2.0     |
|  | 0.9                   | 1.0 | 1.0  | 1.2 | 1.0  | 1.1  | 1.1 | 0.8 | 0.9 | 1.0 | 1.0     |

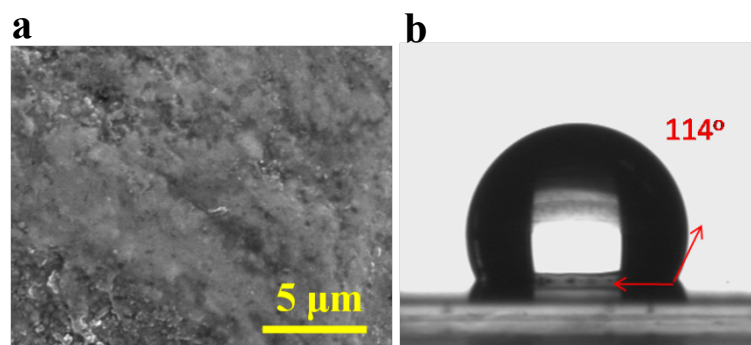

**Figure S3.** SEM images of near flat surface of Te thin film (a) and static contact angle photographs of water droplet (6 μL) on its surface (b).

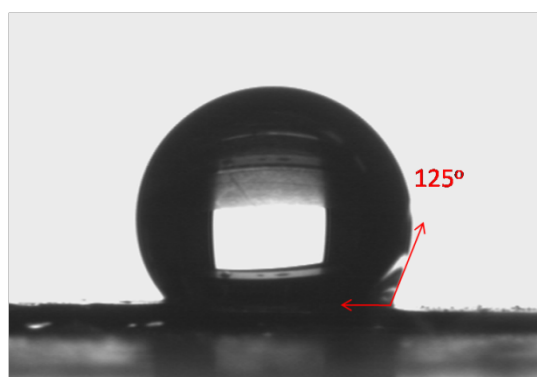

**Figure S4.** Static contact angle photograph of a large water droplet (10 μL) on surface of triangle microrods array.

**Table S2.** Fraction of liquid-solid contact area calculated from high-contrast black and white SEM images. The selective area is 50×50  $\mu\text{m}$  for triangle microrods array and 10×10  $\mu\text{m}$  for hexagon microrods array, needle microrods array and needle nanowires networks. Measurement of  $f$  is carried out three times for each sample.

| Patterns                                                                          | $f$  |      |      | Average |
|-----------------------------------------------------------------------------------|------|------|------|---------|
|                                                                                   | 1    | 2    | 3    |         |
|  | 0.57 | 0.59 | 0.58 | 0.58    |
|  | 0.54 | 0.59 | 0.56 | 0.56    |
|  | 0.50 | 0.48 | 0.50 | 0.49    |
|  | 0.46 | 0.47 | 0.46 | 0.46    |
